# Supplementary material
Source: publisher figshare collection journal article supplement (https://acs.figshare.com/ndownloader/files/4348330)
Supplement: Supplementary file 1 [file 4348330]

# **Kinetic Measurements on Single-molecule Disulfide Bond Cleavage**

## **Supporting Information**

Jian Liang<sup>1,\*,#</sup> and Julio M. Fernández<sup>1,\*</sup>

<sup>1</sup>Department of Biological Sciences, Columbia University, New York, NY 10027, USA

\*Address correspondence to [jliang@temple.edu](mailto:jliang@temple.edu), or [jfernandez@columbia.edu](mailto:jfernandez@columbia.edu).

---

<sup>#</sup> Current address: Department of Biology, Temple University.

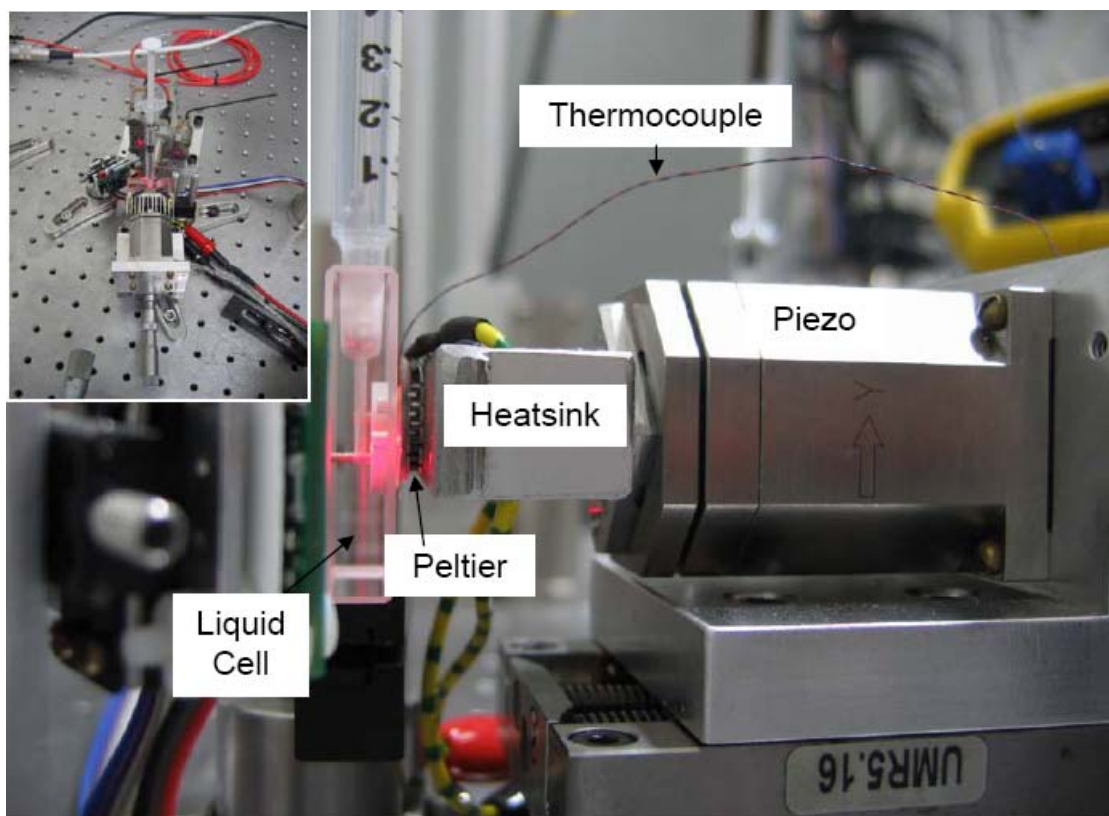

**Figure S1.** A close snapshot of our temperature-controlled atomic force microscope in actual operation. The arrangement of the liquid cell, thermoelectric device (Peltier), heatsink, piezo and thermocouple is shown. Inset: the top view of the AFM.

**Table S1.**  $\Delta x_r$  values measured from the fitting of rate with force using Equation 1 for different  $S_N2$  reactions at different temperatures

|                                      | Temperature     |                 |                 |                 |                 |
|--------------------------------------|-----------------|-----------------|-----------------|-----------------|-----------------|
|                                      | 278 K           | 288 K           | 298 K           | 308 K           | 318 K           |
| $\Delta x_r$ for TCEP (Å)            | $0.42 \pm 0.03$ | $0.40 \pm 0.02$ | $0.48 \pm 0.02$ | $0.45 \pm 0.03$ | $0.47 \pm 0.03$ |
| $\Delta x_r$ for DTT (Å)             | –               | $0.36 \pm 0.03$ | $0.37 \pm 0.03$ | $0.38 \pm 0.03$ | $0.40 \pm 0.03$ |
| $\Delta x_r$ for HS <sup>–</sup> (Å) | $0.35 \pm 0.04$ | $0.37 \pm 0.04$ | $0.37 \pm 0.03$ | $0.40 \pm 0.04$ | –               |
